# Supplementary material for: Solid Tumors in RASopathies: Insights from a Large Monocentric Cohort and Systematic Review of the Literature
Source: Research Square preprint supplement (doi:10.21203/rs.3.rs-7979959/v1), 2025-11-19
Supplement: Supplementary file 1 [file 15dfb305cc4e353198ebed0d.docx]

**Suppl. Table 1.Noonan syndrome (NS) patients with (n=8) or without (n=66) a solid tumor in FPG cohort.**

| **Affected gene** | **Amino Acid substitution** | **NS patients with solid tumors (n=6), n (%)** | **Tumor type** | **NS patients without solid tumors (n=37), n (%)** | ***P a*** |
| --- | --- | --- | --- | --- | --- |
|  | Glu139Asp | 2b (33.3) | *in situ* melanoma, neuroblastoma + glioma | 0.0 | **<0.02** |
|  | Ile282Val | 1 (16.7) | *in situ* melanoma | 0.0 | 0.14 |
| *PTPN11* | Asn308Ser | 1 (16.7) | glioma + spinal neurofibroma | 0.0 | 0.14 |
|  | Gly503Arg | 1 (16.7) | glioma | 1 (2.7) | 0.26 |
|  | Met504Val | 1 (16.7) | glioma | 1 (2.7) | 0.26 |
|  |  |  |  |  |  |
| **Affected gene** | **Amino Acid substitution** | **NS patients with solid tumors (n=1), n (%)** | **Tumor type** | **NS patients without solid tumors (n=9), n (%)** | ***p***a |
| *SOS1* | Ser548Arg | 1 (100) | *in situ* melanoma | 0 (0.0) | 0.10 |
|  |  |  |  |  |  |
| **Affected gene** | **Amino Acid substitution** | **NS patients with solid tumors (n=1), n (%)** | **Tumor type** | **NS patients without solid tumors (n=3), n (%)** | ***p***a |
| *RIT1* | Ala57Gly | 1 (100) | giant cell lesion of the jaw | 0 (0.0) | 0.25 |

aTwo-tailed Fisher’s Exact test.

b Familial case (one affected subject with multiple tumors).

**Suppl. Table 2. Costello syndrome (CS) patients with (n=11) or without (n=12) a solid tumor in FPG cohort.**

| **Affected gene** | **Amino Acid substitution** | **NS patients with solid tumors (n=11), n (%)** | **our type** | **NS patients without solid tumors (n=12), n (%)** | ***p***a |
| --- | --- | --- | --- | --- | --- |
| *HRAS* | Gly12Ser | 11b (100) | bladder tumors (14)c, breast neoplasia (2)d, neuroblastoma (1), gastric leiomyoma (1) rhabdomyosarcoma (1), Melanocytoma (1), Melanoma in situ (1), | 8 (66.7) | 0.09 |

aTwo-tailed Fisher’s Exact test.

b Multiple tumors were observed in three patients.

c 7/14 Papillary Urothelial Neoplasia of low malignant potential (PUNLMP) and 7/14 low-grade urothelial carcinoma

d multiple intraductal papilloma of the breast.

**Suppl. Table 3. Patients with cardiofaciocutaneous syndrome (CFCS) with (*n=3*) or without (*n=38*) a solid tumor in FPG cohort.**

| **Affected gene** | **Amino Acid substitution** | **CFCS patients with solid tumors (*n=2*), n (%)** | **Tumor type** | **CFCS patients without solid tumors (*n=0*), n (%)** | ***p***a |
| --- | --- | --- | --- | --- | --- |
| *BRAF* | Thr470Pro | 1 (50.0) | giant cell lesion | 0.0 | 0.06 |
|  | Lys499Asn | 1 (50.0) | Pylocytic astrocytoma | 0.0 | 0.06 |
| **Affected gene** | **Amino Acid substitution** | **CFCS patients with solid tumors (*n=1*), n (%)** | **Tumor type** | **CFCS patients without solid tumors (*n=2*), n (%)** | ***p***a |
| *MAP2K1* | Tyr130Cys | 1 (100) | Multiple spinal neurofibromas | 2 (100) | - |

a Two-tailed Fisher’s Exact test.

**Suppl. Table 4.Noonan syndrome (NS) patients with (*n=79*) or without (*n=3002*) a solid tumor reported in literature*.**

| **Affected gene** | **Amino Acid substitution** | | **NS patients with solid tumors (*n=45*), n (%)** | **Tumor type** | **NS patients without solid tumors (*n=2330*), n (%)** | ***p***a |
| --- | --- | --- | --- | --- | --- | --- |
|  | Asn58Asp/Lys | 3 (6.7) | | DNET3 (2), glioma | 58 (2.5) | 0.11 |
|  | Gly60Ala | 3 (6.7) | | neuroblastoma, glioma, DNET | 52 (2.2) | 0.08 |
|  | Asp61Gly | 2 (4.4) | | DNET (2) | 92 (3.9) | 0.70 |
|  | Tyr62Cys/Asp | 2 (4.4) | | neuroblastoma, giant cell lesion | 76 (3.3) | 0.66 |
|  | Asp106Ala | 3 (6.7) | | giant cell lesion (2), breast cancer | 29 (1.2) | **<0.02** |
|  | Glu139Asp | 2 (4.4) | | glioma, DNET | 121 (5.2) | 1.0 |
|  | Ile282Met/Val | 2 (4.4) | | neuroblastoma (2) | 51 (2.2) | 0.27 |
| *PTPN11* | Phe285Leu | 2 (4.4) | | giant cell lesion (2) | 27 (1.2) | 0.10 |
|  | Asn308Asp/Ser | 13 (28.9) | | neuroblastoma (2), glioma (2), other CNS (2), DNET (2), giant cell lesion (2), granular cell tumour, hepatoblastoma, ganglioneuroma | 685 (29.4) | 1.0 |
|  | Ser502Thr | 2 (4.4) | | neuroblastoma (2) | 16 (0.7) | **<0.05** |
|  | Gly503Arg | 2 (4.4) | | granular cell tumour (2) | 75 (3.2) | 0.66 |
|  | Met504Val | 3 (6.7) | | colorectal cancer (2), angiosarcoma | 118 (5.1) | 0.50 |
|  |  |  | |  |  |  |
| **Affected gene** | **Amino Acid substitution** | **NS patients with solid tumors (n=21), n (%)** | | **Tumor type** | **NS patients without solid tumors (n=413), n (%)** | ***p***a |
| *SOS1* | Arg552Lys/Gly/Ser/Thr | 8 (38.1) | | giant cell lesion (7), granular cell tumour | 105 (25.4) | 0.21 |
|  | Glu846Lys | 4 (19.0) | | giant cell lesion (4) | 26 (6.3) | **<0.05** |
|  |  |  | |  |  |  |
| **Affected gene** | **Amino Acid substitution** | **NS patients with solid tumors (n=2), n (%)** | | **Tumor type** | **NS patients without solid tumors (n=35), n (%)** | ***p***a |
| *NRAS* | Gly12Arg | 2 (100) | | rhabdomyosarcoma, CNS tumour | - | **<0.002** |

*Only amino acid substitutions that recur in at least two NS patients with neoplasia are shown. Updated to December 2023.

2Two-tailed Fisher’s Exact test.

**Suppl. Table 5Noonan syndrome (NS) patients with (n=88) or without (n=3068) a solid tumor reported in literature1 and FPG cohort.**

| **Affected gene** | **Amino Acid substitution** | **Patients with solid tumors (n=51), n (%)** | **Tumor type** | **Patients without solid tumors (n=2367), n (%)** | ***P*** a |
| --- | --- | --- | --- | --- | --- |
|  | Asn58Asp/Lys | 3 (5.9) | DNETb (2), glioma | 58 (2.5) | 0.14 |
|  | Gly60Ala | 3 (5.9) | neuroblastoma, glioma, DNET | 52 (2.2) | 0.11 |
|  | Asp61Gly | 2 (3.9) | DNET (2) | 92 (3.9) | 1 |
|  | Tyr62Cys/Asp | 2 (3.9) | neuroblastoma, giant cell lesion | 76 (3.2) | 0.68 |
|  | Asp106Ala | 3 (5.9) | giant cell lesion (2), breast cancer | 29 (1.2) | **<0.03** |
|  | Glu139Asp | 4c (7.8) | Glioma (2), DNET, melanoma, neuroblastoma | 121 (5.1) | 0.33 |
|  | Ile282Met/Val | 3 (5.9) | neuroblastoma (2), melanoma | 51 (2.2) | 0.10 |
| *PTPN11* | Phe285Leu | 2 (3.9) | giant cell lesion (2) | 27 (1.1) | 0.12 |
|  | Asn308Asp/Ser | 14 (27.5) | glioma (3), neuroblastoma (2), other CNS (2), DNET (2), giant cell lesion (2), granular cell tumor, hepatoblastoma, ganglioneuroma | 685 (28.9) | 0.88 |
|  | Ser502Thr | 2 (3.9) | neuroblastoma (2) | 16 (0.7) | **0.05** |
|  | Gly503Arg | 3 (5.9) | granular cell tumour (2), glioma | 76 (3.2) | 0.23 |
|  | Met504Val | 5 (7.8) | colorectal cancer (2), angiosarcoma, glioma | 119 (5.0) | 0.33 |
|  |  |  |  |  |  |
| **Affected gene** | **Amino Acid substitution** | **Patients with solid tumors (n=22), n (%)** | **Tumor type** | **Patients without solid tumors (n=422), n (%)** | ***P*** a |
|  | Ser548Arg | 2 (9.1) | rhabdomyosarcoma, melanoma | 21 (5.0) | 0.32 |
| *SOS1* | Arg552Lys/Gly/Ser/Thr | 8 (36.4) | giant cell lesion (7), granular cell tumor | 105 (24.9) | 0.22 |
|  | Glu846Lys | 4 (18.2) | giant cell lesion (4) | 26 (6.2) | **0.05** |
|  |  |  |  |  |  |
| **Affected gene** | **Amino Acid substitution** | **Patients with solid tumours (n=3), n (%)** | **Tumor type** | **Patients without solid tumors (n=32), n (%)** | ***P*** a |
| *NRAS* | Gly12Arg | 2 (100) | rhabdomyosarcoma, CNS tumour | - | **<0.002** |

1Only amino acid substitutions that recur in at least two NS patients with neoplasia are shown. Updated to December 2023.

aTwo-tailed Fisher’s Exact test.

bDysembryoplastic neuroepithelial tumors

cFamilial case (one affected subject with multiple tumors).

**Suppl. Table 6. Costello syndrome (CS) patients with (*n=27*)1 or without (*n=307*)1 a solid tumor in literature.**

| **Affected gene** | **Amino Acid substitution** | **Patients with solid tumors, n (%)** | **Tumor type** | **Patients without solid tumors, n (%)** | ***P*** a |
| --- | --- | --- | --- | --- | --- |
|  | Gly12Ser | 18 (66.7) | gastric leyoma (1); rhabdomyosarcoma (13); bladder neoplasia (2); neuroblastoma (2) | 215 (70.0) | 0.83 |
| *HRAS* | Gly12Ala | 7b (25.9) | rhabdomyosarcoma (4); bladder neoplasia (5); neuroblasoma (1) | 20 (6.5) | 0.003 |
|  | Gly12Cys | 2 (7.4) | rhabdomyosarcoma (2) | 7 (2.3) | 0.16 |

1Only CS patients with a molecular diagnosis were included. Updated to December 2023.

aTwo-tailed Fisher’s Exact test.

b Multiple bladder tumors were detected in one patient (Sovik et al. 2009).

**Suppl. Table 7 Costello syndrome (CS) patients with (*n=38*) or without (*n=319*) a solid tumor in literature and FGP cohort.**

| **Affected gene** | **Amino Acid substitution** | **CS patients with solid tumours (n=38)a, (%)** | **Tumour typeb** | **CS patients without solid tumors (n=319)1,(%)** | ***P*** c |
| --- | --- | --- | --- | --- | --- |
| *HRAS* | Gly12Ser | 29 (76.3) | gastric leiomyoma (1); 7 PUNLMP; low grade urothelial carcinoma (9); melanocytoma (1); melanoma *in situ* (1); intraductal papillomata of the breast (2); 1 ganglioneuroblastoma (1); rhabdomyosarcoma (14); neuroblastoma (1) | 215 (67.4) | *0.26 (chi2)* |
|  | Gly12Ala | 7 (18.4) | rhabdomyosarcoma (4); 5 bladder tumours (5); ganglioneuroblastoma (1) | 20 (6.3) | **0.016** |
|  | Gly12Cys | 2 (5.3) | rhabdomyosarcoma (2) | 7 (2.2) | 0.25 |

aOnly CS patients with a molecular diagnosis were included.

bMultiple tumors were observed in five patients.

cTwo-tailed Fisher’s Exact test.

**Suppl. Table 8. Patients with cardiofaciocutaneous syndrome (CFCS) with (*n=7*) solid tumor in literature and FPG cohort.**

| **Affected gene** | **Amino Acid substitution** | **CFCS patients with solid tumors (*n=4*), n (%)** | **Tumor type** |
| --- | --- | --- | --- |
| *BRAF* | Gln257Arg  Thr470Pro | 2 (50)  1 (25) | giant cell lesion (2)  giant cell lesion |
|  | Lys499Asn | 1 (50.0) | glioma |
| **Mutated gene** | **Amino Acid substitution** | **CFCS patients with solid tumors (*n=3*), n (%)** | **Tumor type** |
| *MAP2K1* | Tyr130Cys | 1 (100) | Multiple spinal neurofibromas (1), giant cell lesion of the jaw (1), hepatoblastoma (1) |

**Suppl. Table 9. *PTPN11*-positive Noonan syndrome with multiple lentigines (NSML) cases with (n=16)1 or without (n=404) a solid tumor in literature.**

| **Affected gene** | **Amino Acid substitution** | **NS patients with solid tumors, n (%)** | **Tumour type** | **NSML patients without solid tumors, n (%)** | ***P*** a |
| --- | --- | --- | --- | --- | --- |
| *PTPN11* | Tyr279Cys | 5 (31.2) | neurofibroma (3), melanoma (2) | 99 (24.5) | 0.56 |
|  | Thr468Met | 9 (56.2) | brain tumors (4), melanoma (2), granular cell tumor, giant cell lesions, neurofibromas | 150 (37.1) | 0.19 |

1Only amino acid substitutions that recur in at least two NS patients with neoplasia are shown. Updated to December 2023.
aTwo-tailed Fisher’s Exact test.

**Suppl. Table 10. Other genes involved in NS and NS-like phenotypes associated with solid tumors#**

| **Affected gene** | **Amino Acid substitution** | **N° of individuals reported** | **Tumour type** |
| --- | --- | --- | --- |
| *KRAS* | Gln22Arg p.Asp153Val | 1 1 | Brain tumor (1) tenosynovial giant cell tumor (1) |
| *LZTR1* | Arg284Cys | 1 | brain tumors (1), |
| *RAF1*  *RRAS2* | Gly361Ala  Gly23Cys | 1  1 | brain tumors (1),  embryonal RMS (1) |
| *SHOC2*  *CBL* | Ser2Gly  Gln367Pro | 1  1 | tenosynovial giant cell tumor (1)  ovarian mixed immature teratoma (1) |
| *RIT1* | p.Ala57Gly  Phe82Leu | 1 1 | multiple giant cell lesions of the jaw (1) gastrointestinal stromal tumor associated with neuroendocrine tumor (1) |

#References:

1. Guiffre D, Brien E, Shon W, Geffner ME. A Rare Case of Diffuse-type Tenosynovial Giant Cell Tumor in a Teenager with Noonan Syndrome. J Pediatr Hematol Oncol 2022 Mar 1; 44(2):E557–60. https://pubmed.ncbi.nlm.nih.gov/34133387/

2. Garavelli L, Cordeddu V, Errico S, Bertolini P, Street ME, Rosato S, et al. Noonan syndrome-like disorder with loose anagen hair: A second case with neuroblastoma. Am J Med Genet A. 2015 Aug 1; 167(8):1902–7. https://pubmed.ncbi.nlm.nih.gov/25846317/

3. Ji J, Navid F, Hiemenz MC, Kaneko M, Zhou S, Saitta SC, et al. Embryonal rhabdomyosarcoma in a patient with a germline CBL pathogenic variant. Cancer Genet. 2019 Feb 1 [cited 2025 May 21];231–232:62–6. https://pubmed.ncbi.nlm.nih.gov/30803559/

4. Kouz K, Lissewski C, Spranger S, Mitter D, Riess A, Lopez-Gonzalez V, et al. Genotype and phenotype in patients with Noonan syndrome and a RIT1 mutation. Genetics in Medicine. 2016 Dec 1 [cited 2025 May 21];18(12):1226–34. <https://pubmed.ncbi.nlm.nih.gov/27101134>

5. Kratz CP, Franke L, Peters H, Kohlschmidt N, Kazmierczak B, Finckh U, et al. Cancer spectrum and frequency among children with Noonan, Costello, and cardio-facio-cutaneous syndromes. Br J Cancer. 2015 Apr 14;112(8):1392–7.

6. Jacquinet A, Bonnard A, Capri Y, Martin D, Sadzot B, Bianchi E, et al. Oligo-astrocytoma in LZTR1-related Noonan syndrome. Eur J Med Genet. 2020 Jan 1; 63(1). Available from: https://pubmed.ncbi.nlm.nih.gov/30664951/

7. Harms FL, Alawi M, Amor DJ, Tan TY, Cuturilo G, Lissewski C, et al. The novel RAF1 mutation p.(Gly361Ala) located outside the kinase domain of the CR3 region in two patients with Noonan syndrome, including one with a rare brain tumor. Am J Med Genet A. 2018 Feb 1;176(2):470–6.

8. Zeng L, Wang J, Zhu H, Huang Y, Deng Y, Wei P, et al. The RRAS2 pathogenic variant (c.67G>T; p. Gly23Cys) produces Noonan syndrome with embryonal rhabdomyosarcoma. Mol Genet Genomic Med. 2024 Jan 1 [cited 2025 May 21];12(1). https://pubmed.ncbi.nlm.nih.gov/37942564/

41.
