# Supplementary material for: Solid Tumors in RASopathies: Insights from a Large Monocentric Cohort and Systematic Review of the Literature
Source: Research Square preprint supplement (doi:10.21203/rs.3.rs-7979959/v1), 2025-11-19
Supplement: Supplementary file 2 [file a6e0b368115f2d5f122e24de.docx]

**Supplementary Figure 1 PRISMA Flowchart.**

**Identification of studies via databases and registers**

Records removed *before screening*: (*n = 986*)

Records identified from*:

Databases (*n = 1431*)

**Identification**

Records screened

(*n = 445*)

Records excluded**

(*n = 226*)

**Screening**

Reports excluded:

Reason 1 (*n= 122*)

Reports assessed for eligibility

(*n = 219*)

Studies included in review

(*n = 97*)

**Included**

**PRISMA flowchart showing the study selection process.** A total of 1431 studies were identified from publication databases, and 986 were initially identified and excluded. Following the screening of titles and abstracts, 226 references were determined to be irrelevant for review. The full text for the 219 remaining articles was reviewed. One hundred and twenty-two were excluded due to (1) having duplicate cases/cohorts, (2) no molecular diagnosis, (3) wrong patient population or (4) presenting aggregate data for cases/determined to have high risk for bias. A total of 97 articles that met inclusion and exclusion criteria were ultimately included.

*From:*  Page MJ, McKenzie JE, Bossuyt PM, Boutron I, Hoffmann TC, Mulrow CD, et al. The PRISMA 2020 statement: an updated guideline for reporting systematic reviews. BMJ 2021;372:n71. doi: 10.1136/bmj.n71
