# Supplementary material for: Solid Tumors in RASopathies: Insights from a Large Monocentric Cohort and Systematic Review of the Literature
Source: Research Square preprint supplement (doi:10.21203/rs.3.rs-7979959/v1), 2025-11-19
Supplement: Supplementary file 3 [file d28806be7e10a3a70823c7cb.docx]

**Supplementary Materials: Methodology**

*Molecular analysis*

Molecular studies were performed in the frame of routine diagnostic setting using genomic DNA isolated from circulating leukocytes. Mutation scan was conducted over multiple years, utilizing gene panels designed to scan the coding sequence and flanking intronic regions of a variable number of RASopathy-associated genes, dynamically updated in accordance with the evolving state of scientific knowledge at the time of each analysis. The full list of genes included *BRAF, CBL, HRAS, KRAS, LZTR1, MAP2K1 (MEK1), MAP2K2 (MEK2), NF1, MRAS, NRAS, PTPN11, RAF1, RASA2, RIT1, RRAS, RRAS2, SHOC2, SOS1, SOS2, SPRED1, SPRED2, PPP1CB,* and *YWHAZ*, as previously reported (1,2).

Sequencing data processing, and variant call and annotation were performed using an in-house implemented bioinformatics pipeline. The human assembly GRCh37 (hg19) was used as the reference genome. Libraries were sequenced using a MiSeq/NextSeq550 apparatus (Illumina). Proper coverage of target regions (depth >30 reads) was attained. Variant filtering and prioritization considered their predicted functional impact and frequency using in-house and public databases (e.g., gnomAD). Variant were classified variants according to the guidelines of the American College of Medical Genetics and Genomics and the Association for Molecular Pathology (ACMG/AMP) (3), along with their refinements outlined by the ClinGen RASopathy Variant Curation Expert Panel (VCEP) (4).

*Investigations conducted*

Given the lack of official guidelines for oncological screening in RASopathies, we developed a tailored cancer surveillance protocol (Supplementary Materials Methodology). All patients performed magnetic resonance imaging (MRI) at diagnosis to investigate central nervous system (CNS) abnormalities (brain and spine) or tumor occurrence, which was repeated according to specific individual’s findings. Each patient performed a dermatologic evaluation with dermatoscopic exam to exclude precancerous or cancerous skin lesions every 6-12 months, depending on the findings. Patients with CS underwent careful clinical evaluation every 6-12 months to exclude RMS, and abdominal ultrasound (US) every 6-12 months (according to age) to exclude visceral neoplasms. Moreover, CS individuals older than 10 years performed urinalysis yearly. Based on recent evidence, cystoscopy was performed after the age of 10 years to check for bladder tumors (30). Additional evaluations (breast ultrasound/MRI, biopsy) were performed upon detection of organ-specific signs suggestive of a tumor. Histopathological examinations were performed on biopsy and all surgically removed specimens collected.

*Sistematic literature review*

Bibliographic search was performed following the 2020 Preferred Reporting Items for Systematic Reviews and Meta-Analyses (PRISMA) guidelines and checklist for reporting this review. In detail, a comprehensive literature review was done separately for NS, CFCS, and CS. The literature search was performed between May 2023 and December 2023 on PubMed using the following queries: RASopathy and cancer or RASopathies, Noonan syndrome, Costello syndrome, cardiofaciocutaneous syndrome, LEOPARD syndrome, Noonan-like syndrome, Mazzanti syndrome, Noonan syndrome with multiple lentigines, Noonan syndrome with loose anagen hair, each combined separately with *BRAF, CBL, ERF, HRAS, KRAS, LZTR1, MAP2K1 (MEK1), MAP2K2 (MEK2), MRAS, NRAS, PTPN11, RAF1, RASA2, RIT1, RRAS, RRAS2, SHOC2, SOS1, SOS2, PPP1CB, YWHAZ, and SPRED2*, and with the terms ‘germline mutation/variant’, ‘cancer’, ‘solid tumor’, ‘neoplasia’, ‘malignancy’, ‘neuroblastoma’, ‘rhabdomyosarcoma’, ‘brain tumor’, ‘glioma’, ‘astrocytoma’, ‘dysembryoplastic neuroepithelial tumor’ (DNET), ‘melanoma’, ‘nevi’, ‘giant cell lesion’, ‘granular cell tumor’, ‘papilloma’, ‘bladder tumor’, and ‘breast cancer’. Inclusion criteria for the systematic revision were: i) papers reporting solid tumors in patients with both clinical and molecular diagnosis of NS and NS-like phenotypes, CFCS, or CS; ii) when molecular diagnosis was lacking, only papers providing the phenotypic details necessary to achieve a robust clinical diagnosis with reasonable degree of confidence were selected; iii) only papers written in English were considered eligible for the study. All abstracts, papers, short reports without molecular diagnosis or duplicates were excluded after careful evaluation.

1. Zenker M. Clinical overview on RASopathies. Vol. 190, American Journal of Medical Genetics, Part C: Seminars in Medical Genetics. John Wiley and Sons Inc; 2022. p. 414–24.

2. Reynolds G, Gazzin A, Carli D, Massuras S, Cardaropoli S, Luca M, et al. Update on the Clinical and Molecular Characterization of Noonan Syndrome and Other RASopathies: A Retrospective Study and Systematic Review. Int J Mol Sci [Internet]. 2025 Apr 1 [cited 2025 Jul 18];26(8). Available from: https://pubmed.ncbi.nlm.nih.gov/40332000/

3. Richards S, Aziz N, Bale S, Bick D, Das S, Gastier-Foster J, et al. Standards and guidelines for the interpretation of sequence variants: A joint consensus recommendation of the American College of Medical Genetics and Genomics and the Association for Molecular Pathology. Genetics in Medicine [Internet]. 2015 May 8 [cited 2025 Jul 16];17(5):405–24. Available from: https://pubmed.ncbi.nlm.nih.gov/25741868/

4. Gelb BD, Cavé H, Dillon MW, Gripp KW, Lee JA, Mason-Suares H, et al. ClinGen’s RASopathy Expert Panel consensus methods for variant interpretation. Genet Med [Internet]. 2018 Nov 1 [cited 2024 Mar 14];20(11):1334–45. Available from: https://pubmed.ncbi.nlm.nih.gov/29493581/
